# Supplementary material for: Mental Health, Greenness and Nature Related Behaviours in the Adult Population of Stockholm County during Covid-19-related Restrictions
Source: Preprints.org preprint supplement (doi:10.20944/preprints202103.0201.v1), 2021-03-05
Supplement: Supplementary file 1 [file supplementary]

Table C. Background characteristics of the municipalities involved in the study

| **Municipality** | **Number of participants** | **Average NDVI 50m (min; max)** | **Average walkability index (min; max)** |
| --- | --- | --- | --- |
| Danderyd | 40 | 0.55 (0.35; 0.66) | 81.27 (60.42; 100) |
| Huddinge | 96 | 0.48 (0.15; 0.72) | 78.31 (52.08; 96.88) |
| Järfälla | 81 | 0.45 (0.16; 0.61) | 81.24 (39.93; 100) |
| Lidingö | 47 | 0.45 (0.15; 0.62) | 83.95 (63.54; 96.88) |
| Sollentuna | 91 | 0.46 (0.21; 0.64) | 78.95 (50.00; 100) |
| Solna | 114 | 0.43 (0.13; 0.63) | 86.44 (48.96; 100) |
| Stockholm | 1,254 | 0.38 (0.08; 0.77) | 84.58 (35.42; 100) |
| Sundbyberg | 74 | 0.35 (0.15; 0.64) | 84.66 (62.50; 100) |
| Södertälje | 61 | 0.49 (0.15; 0.73) | 75.40 (48.96; 100) |
| Tyresö | 60 | 0.51 (0.17; 0.68) | 77.39 (43.75; 100) |
| Täby | 98 | 0.46 (0.21; 0.67) | 83.34 (48.96; 100) |
| Upplands Väsby | 44 | 0.44 (0.21; 0.71) | 80.72 (61.46; 100) |


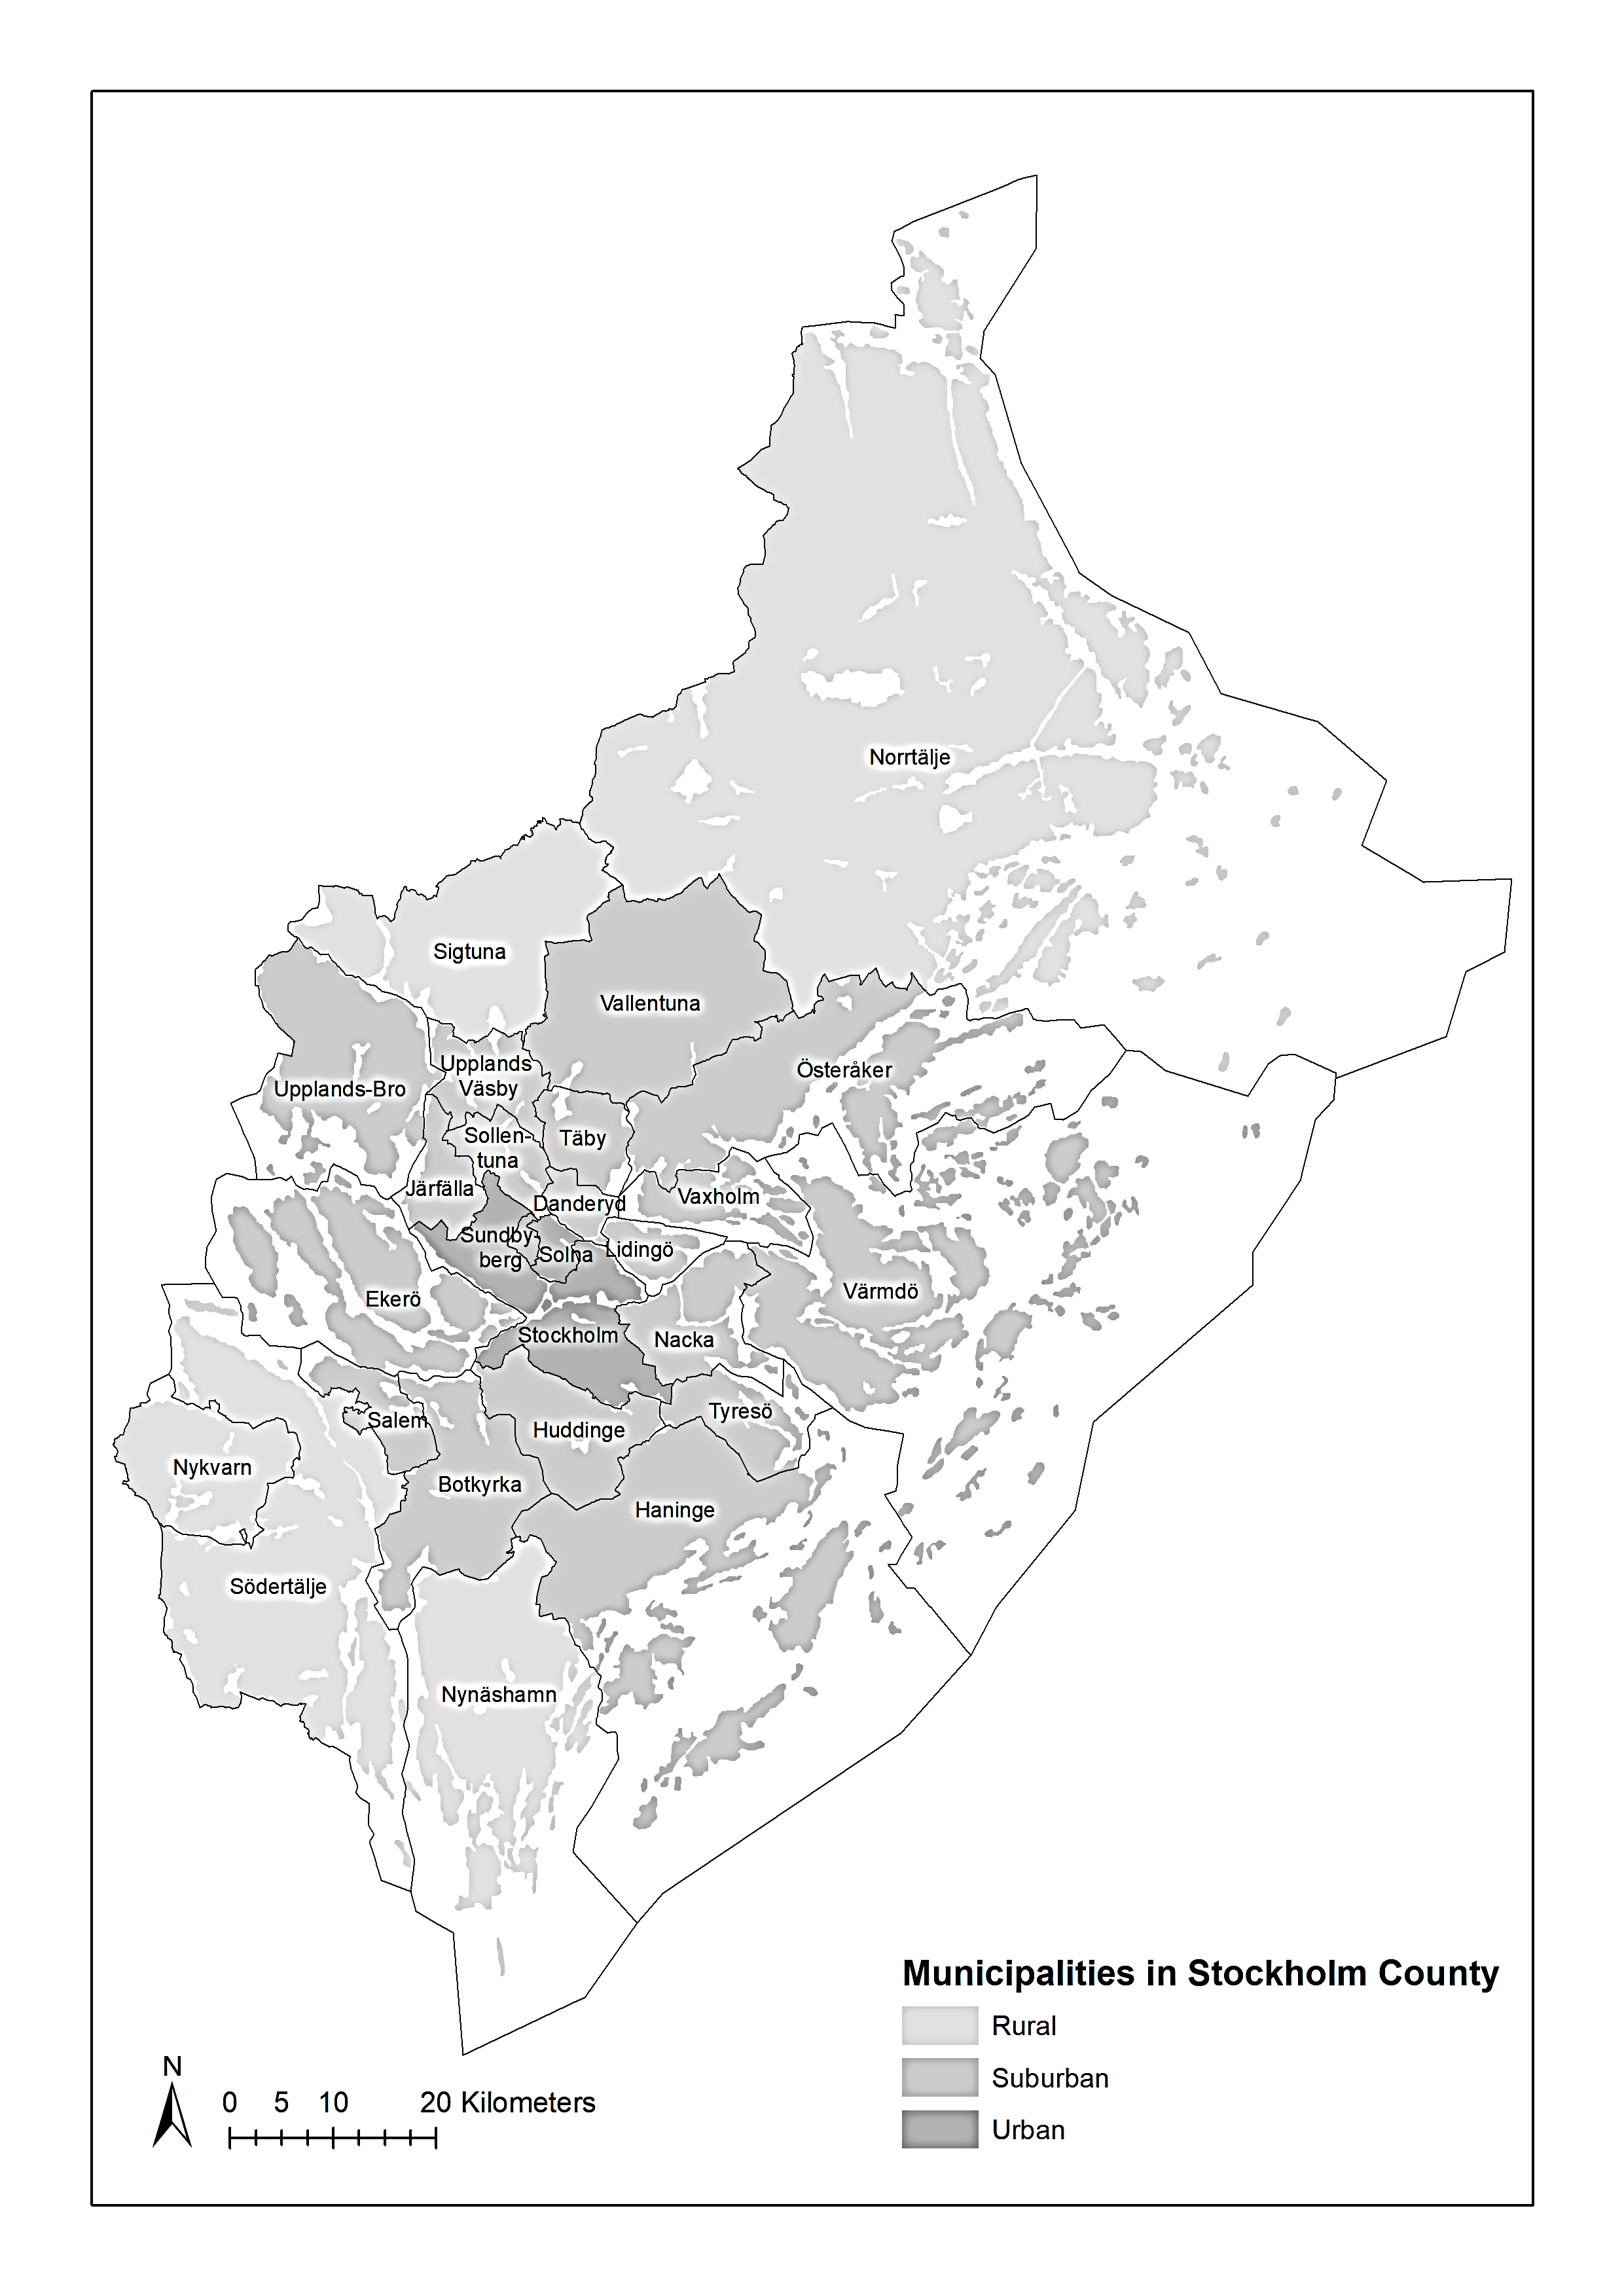
Figure C. The municipalities of Stockholm County
